# Supplementary material
Source: MDPI journal article supplement (https://www.mdpi.com/1424-2818/16/8/472)

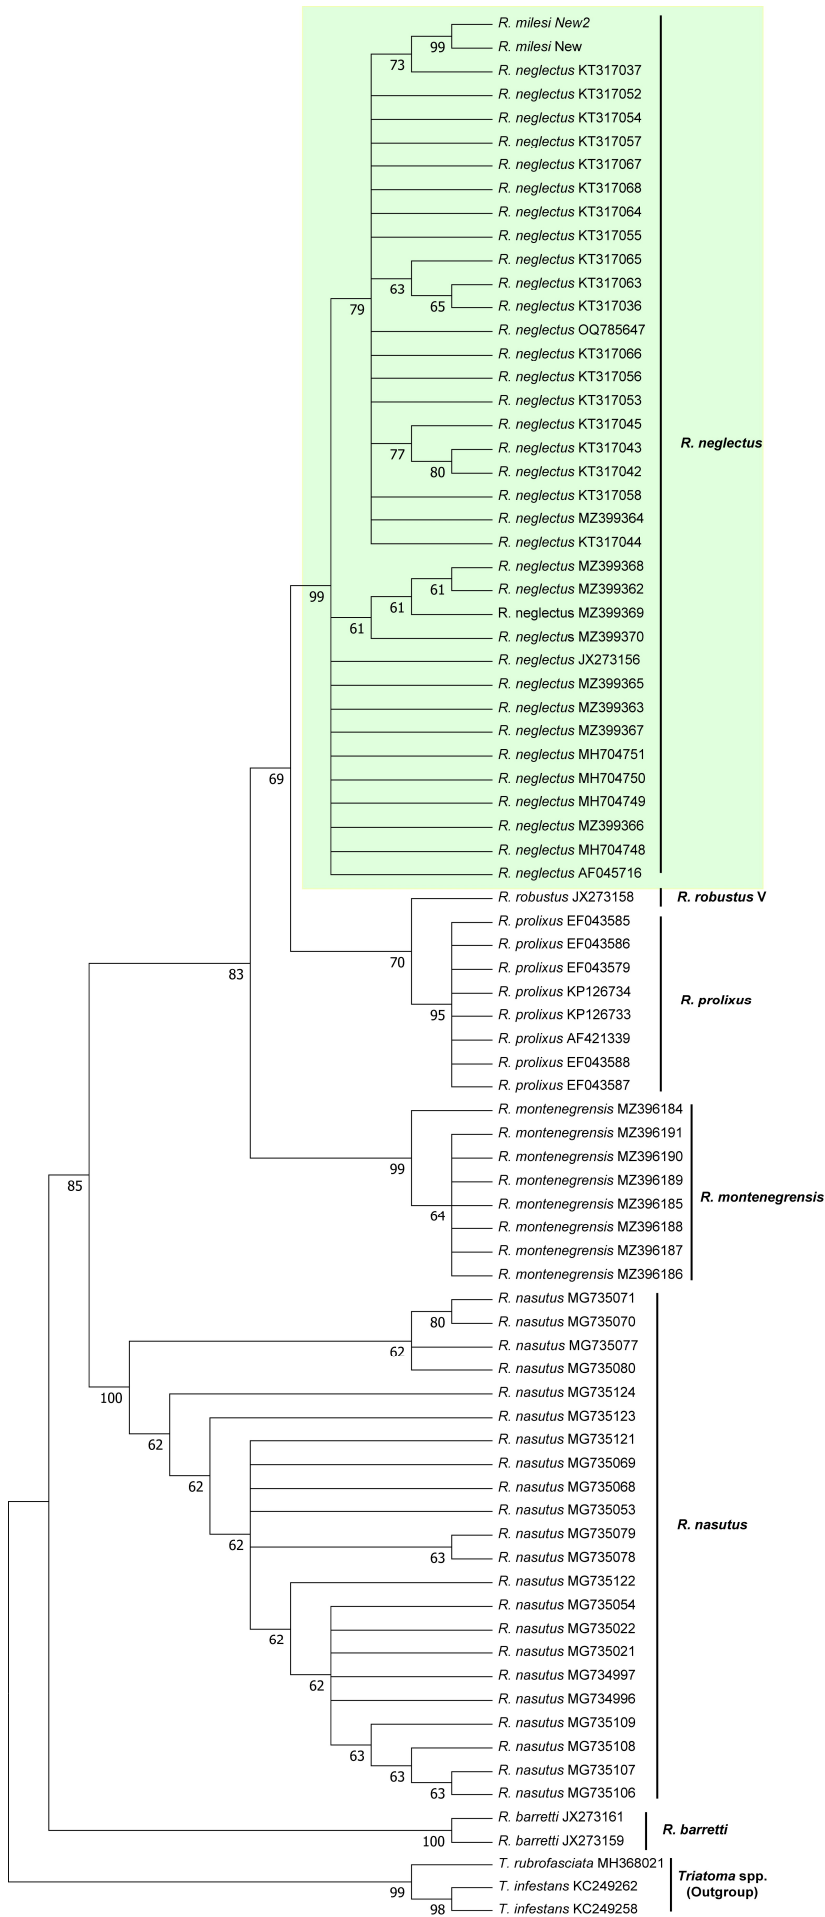

Supplement: s1 [file s1]
